# Supplementary material for: HBcAb Positivity Increases the Risk of Severe Hepatic Fibrosis Development in HIV/HCV-Positive Subjects From the ICONA Italian Cohort of HIV-Infected Patients
Source: PubMed Central journal article supplement — Open Forum Infect Dis. 2020 Nov 18;8(1):ofaa566. doi: 10.1093/ofid/ofaa566 (PMC7781466; doi:10.1093/ofid/ofaa566), 2020-11-18
Supplement: ofaa566_suppl_supplementary_table_1.pdf [file ofaa566_suppl_supplementary_table_1.pdf]

**Supplemental table.** Relative Hazards from fitting a Cox regression model with endpoint Fib4 elevation >1.45

|                                | Unadjusted and adjusted relative hazards of Fib4>1.45 |             |                          |             |                           |             |
|--------------------------------|-------------------------------------------------------|-------------|--------------------------|-------------|---------------------------|-------------|
|                                | Unadjusted RH<br>(95% CI)                             | p-<br>value | Adjusted* RH<br>(95% CI) | p-<br>value | Adjusted** RH<br>(95% CI) | p-<br>value |
| <i>Exposure group</i>          |                                                       |             |                          |             |                           |             |
| Group A (HCVAb-/HBsAg-/HBcAb-) | 1                                                     |             | 1                        |             | 1                         |             |
| Group B (HCVAb+/HBsAg-/HBcAb-) | 3.09 (2.42, 3.93)                                     | <.001       | 2.57 (1.90, 3.47)        | <.001       | 2.56 (1.90, 3.46)         | <.001       |
| Group C (HBcAb+/HCVAb+/HBsAg)  | 1.78 (1.32, 2.40)                                     | <.001       | 1.28 (0.95, 1.73)        | 0.110       | 1.30 (0.96, 1.76)         | 0.088       |
| Group D (HCVAb+/HBcAb-/HBsAg-) | 4.04 (3.07, 5.33)                                     | <.001       | 2.46 (1.68, 3.60)        | <.001       | 2.47 (1.69, 3.61)         | <.001       |
| Group E (HBsAg+/HBcAb+/HCV-)   | 2.76 (2.00, 3.80)                                     | <.001       | 2.34 (1.70, 3.23)        | <.001       | 2.31 (1.67, 3.19)         | <.001       |

\*adjusted for age, mode of HIV transmission and nation of birth; \*\*adjusted for age, mode of HIV transmission, nation of birth and level of alcohol consumption
